# Supplementary material for: WRN and WRNIP1 ATPases impose high fidelity on translesion synthesis by Y-family DNA polymerases
Source: eLife journal article supplement (doi:10.7554/elife.106934), 2025-06-25
Supplement: fig1-data1 [file elife-106934-fig1-data1-v1.zip]

## Sheet: Vector
IdU length (red)		CldU length (green)		IdU length (red)		CldU length (green)		IdU length (red)		CldU length (green)
7.39		2.55		9.24		2.89		2.96		2.98
7.75		2.61		5.3		1.43		6.01		3.25
7.85		3.24		8.41		1.37		5.67		1.09
5.38		2.87		5.45		2.66		3.15		1.48
8.02		2.94		1.2		1.54		4.95		1.19
3.47		2.34		4.65		1.78		1.76		1.48
5.92		4.7		4.91		1.71		2.65		3.91
9.43		3.84		5.07		1.96		6.19		1.54
4.7		2.31		3.42		5.24		6.82		2.71
4.54		4.81		1.22		1.55		6.95		1.55
4.45		2.89		4.32		3.52		3.81		1.47
6.72		3.45		5.69		1.36		2.58		2.71
7.32		4.25		8.22		3.67		4.95		1.84
5.21		2.66		6.78		2.17		3.61		1.87
11.34		5.47		2.17		1.24		2.51		3.21
5.45		1.78		2.3		2.56		0.86		1.22
5.64		1.71		3.4		9.26		4.27		1.67
2.54		1.96		7.26		2.32		6.17		2.24
6.25		2.59		7.37		3.24		5.86		2.14
6.53		1.55		8.24		1.25		7.93		3.25
8.23		3.52		8.6		1.75		9.27		3.28
8.95		1.36		8.82		1.39		5.74		2.38
5.03		2.14		7.43		1.61		6.98		2.34
2.99		2.17		8.34		2.74		7.46		1.42
8.65		3.25		7.68		1.56		3.72		1.26
5.64		2.56		9		1.28		3.37		2.14
6.45		2.14		9.04		3.87		6.52		3.25
4.33		2.32		4.35		2.7		8.67		2.0114
5.27		1.53		6.32		3.24		5.43		1.04
3.47		1.19		4.96		1.81		4.83		2.45
5.28		0.89		7.13		1.11		2.8		1.17
6.21		2.59		6.33		2.59		3.02		2.47
5.47		1.24		6.42		1.24		9.74		2.81
4.17		2.47		7.37		2.35		6.98		2.4
7.13		3.24		8.11		2.47		4.74		2.1
6.33		2.64		5.23		1.56		5.09		1.68
6.42		4.25		8.24		4.58		4.2		1.25
5.28		2.1		3.22		2.88		5.13		1.47
9.95		1.59		7.52		4.78		3.68		1.57
6.92		1.93		13.78		2.48		6.66		1.13
3.22		0.89		9.47		5.85		2.55		2.17
7.52		5.48		10.75		3.01		4.45		2.17
5.25		3.46		8.25		3.94		2.93		1.87
9.47		2.33		5.24		2.77		4.25		2.58
3.58		0.91		4.17		3.8		7.8		2.14
8.25		4.9		5.9		2.14		3.98		2.47
10.42		5.25		4.54		1.5		4.37		2.14
4.17		3.01		2.68		1.14		5.19		2.63
5.9		1.25		3.54		0.44		3.76		2.47
4.54		2.04		7.63		3.8		3.93		1.18
4.39		2.52		4.56		2.14		3.46		1.45
3.9		4.02		5.64		2.47		5.18		1.53
7.63		2.68		6.58		1.25		5.83		1.04
4.56		1.22		4.48		2.31		6.57		2.19
5.64		2.62		4.08		1.25		4.92		1.57
6.58		2.81		5.45		1.24		2.78		1.78
4.48		3.15		5.46		1.61		3.71		2.14
4.08		1.47		2.85		1.79		6.01		1.54
5.45		3.25		4.46		0.55		5.49		1.69
5.46		2.27		9.02		2.47		4.99		1.58
2.85		1.66		9.22		1.25		5.14		1.24
4.46		1.25		4.12		0.25		4.63		2.11
				3.25		1.77		6.92		3.14
				2.51		1.48
				4.32		2.59
				4.48		1.25
Mean length		Mean length		Mean length		Mean length		Mean length		Mean length
6.10688		2.64645		6.1592		2.345		4.96864		2.0197

## Sheet: WT-WRN
IdU length (red)		CldU length (green)		IdU length (red)		CldU length (green)		IdU length (red)		CldU length (green)
5.26		1.48		3.26		3.55		6.61		3.42
4.65		1.71		6.01		1.04		6.05		5.61
4.91		1.42		3.68		2.06		8.99		1.23
5.07		1.29		1.93		0.94		5.1		3.47
3.42		3.67		8.87		1.79		4.39		11.28
1.22		1.36		6.19		8.24		4.29		5.14
4.32		3.35		4.62		3.47		7.93		4.25
5.69		2.17		6.93		4.55		3.56		5.03
8.22		3.3		4.73		1.56		5.33		2.99
6.78		3.26		6.11		2.37		5.3		2.47
2.17		4.58		5.36		5.7		3.26		2.74
2.3		3.27		2.51		3.03		6.01		2.36
3.4		2.71		4.81		4.39		3.68		4.33
7.26		1.35		8.61		0.73		1.93		2.48
2.74		3.81		6.55		1.84		8.87		7.25
5.92		1.79		7.71		5.11		6.19		5.28
9.43		1.31		10.74		6.47		4.62		2.23
4.7		3.81		8.51		5.77		6.93		2.92
4.54		1.72		6.26		5.29		4.73		5.47
4.45		2.89		7.34		4.69		6.11		3.62
6.72		2.87		9.59		2.16		5.36		3.43
7.32		4.25		11.57		3.17		2.51		3.66
2.17		4.03		6.2		5.88		4.81		2.47
11.34		1.06		12.4		6.47		6.54		4.78
5.45		3.05		8.5		5.78		4.51		3.86
1.25		2.51		3.76		2.55		5.05		1.28
2.54		1.79		4.33		3.07		5.94		2.08
3.1		1.43		4.53		2.4		5.63		2.7
5.77		1.58		7.35		5.89		4.43		3.11
4.86		1.58		6.44		5.48		4.04		1.81
6.6		2.17		8.77		2.55		3.75		3.54
6.19		5.47		11.66		7.28		6.06		1.16
6.14		3.62		9.76		5.94		4.16		1.39
5.29		3.43		8.72		5.63		5.67		2.49
2.66		3.66		6.32		4.43		6.56		1.54
3.88		2.47		6.35		4.04		7.38		3.7
4.99		1.57		6.56		3.75		4.21		1.24
3.3		3.86		7.16		6.06		5.99		3.45
5.06		3.58		8.64		4.16		7.09		4.58
3.7		5.2		8.9		5.67		5.03		4.25
3.57		2.5		6.07		6.56		6.9		2.47
3.89		2.77		6.66		7.38		9.45		5.17
3.31		1.47		4.78		4.21
2.9		1.48		4.38		5.99
4.34		2.58		6.92		2.32
3.43		2.74		6.17		5.47
5.63		2.68		8.31		5.78
8.9		5.47
6.27		2.27
5.27		2.42
Mean length		Mean length		Mean length		Mean length		Mean length		Mean length
4.72021		2.7162		6.84106		4.31191		5.49881		3.51738

## Sheet: K577A-WRN
IdU length (red)		CldU length (green)		IdU length (red)		CldU length (green)		IdU length (red)		CldU length (green)
7.71		3.47		8.57		3.01		6.23		2.56
4.78		1.99		3.84		3.94		4.23		2.41
5.32		2.31		8.33		2.77		5.26		2.27
4.96		4.81		10.22		3.8		4.23		1.72
4.01		5.78		5.84		5.43		3.89		8.72
4.07		4.57		8.74		1.5		5.23		5.23
5.8		2.42		10.33		3.98		3.98		2.56
4.59		1.52		8.7		3.93		5.72		3.26
8.4		3.61		7.32		3.8		3.15		2.14
5.9		5.47		7.75		7.1		4.04		2.58
4.54		2.99		7.76		3.98		3.85		3.12
2.68		2.53		4.92		4.05		8.2		6.25
3.9		2.82		5.68		2.31		5.45		4.23
7.63		1.18		6.78		4.31		4.99		2.36
4.56		2.84		7.2		5.03		7.02		5.24
5.64		1.62		5.43		1.61		3.46		3.15
6.58		3.6		5.92		1.79		8.84		2.58
4.48		2.18		7.25		4.39		4.23		3.25
4.08		2.42		8.33		6.16		6.83		3.14
5.45		1.35		5.2		7.23		3.65		2.23
5.46		2.95		8.6		4.42		4.84		2.56
2.85		1.54		8.82		5.66		4.46		3.12
4.46		1.58		7.43		5.25		4.66		3.12
9.02		8.25		8.34		4.88		5.19		3.14
10.93		5.78		7.68		4.56		8.29		6.28
3.81		2.82		5.24		3.19		4.92		2.14
2.65		1.18		9.04		1.65		4.91		3.28
2.51		2.84		4.92		2.41		8.04		4.16
4.32		4.58		8.54		4.25		4.26		2.33
4.48		3.6		6.78		4.1		7.41		2.36
7.43		2.18		7.2		5.33		6.69		3.47
6.03		2.42		5.43		4.05		5.23		4.12
6.47		3.47		5.92		3.25		5.67		1.25
7.85		2.95		7.25		5.24		6.23		1.25
4.91		2.48		5.68		5.1		4.56		2.89
3.09		4.25		6.25		2.58		5.69		2.14
8.78		5.68		7.45		6.58		5.78		3.56
7.76		3.89		3.925		3.975		6.25		2.58
3.81		2.14		7.51		3.24		5.83		3.45
2.65		2.49		7.855		4.8		3.95		2.77
2.51		1.56		7.845		3.3		4.49		2.54
4.32		2.32		8.035		3.43		2.56		1.25
4.48		3.33		7.315		4.25		2.41		2.56
7.43		4.78		9.56		4.13		2.27		3.41
6.03		6.58		6.42		5.595		5.68		4.23
5.64		4.57		9.37		3.25		8.72		4.23
7.25		3.47		6.74		3.58		5.5		3.28
5.7275		3.14		7.41		3.34		5.04		2.25
5.34875		3.68		7.025		5.36		7.05		5.64
4.4325		2.6175		7.505		5.585		5.14		3.14
6.74		2.7525		6.285		4.085		9.57		3.1
6.70625		3.52		5.9		3.25		4.45		1.88
5.05875		2.82		4.54		3.12		2.64		1.25
5.46375		2.7075		5.065		2.985		2.23		1.17
5.615		2.845		6.81		3.02		4.32		2.47
4.28625		3.3425		5.28		2.96		5.68		2.47
5.585		4.25		4.56		2.915		7.56		3.45
5.37		3.1725		5.64		3.07		4.27		1.47
4.21875		3.25		6.58		3.875		8.4		4.27
4.1175		3.55		4.48		3.375
5.09875		3.25		8.58		2.395
5.14875		3.975		5.45		5.03
6.25		3.24		5.46		3.25
				8.25		5.25
				4.46		4.39
Mean length		Mean length		Mean length		Mean length		Mean length		Mean length
5.35625		3.25829		7.03384		4.0321		5.31051		3.14623

## Sheet: K577A-WRN+K274A-WRNIP1
IdU length (red)		CldU length (green)		IdU length (red)		CldU length (green)		IdU length (red)		CldU length (green)
7.14		4.87		6.33		4.29		6.45		3.89
8.98		5.77		5.08		1.19		5.14		2.54
7.38		5.24		5.77		1.71		10.45		3.2
7.33		1.03		4.86		3.78		9.47		3.47
7.71		6.61		6.6		6.2		6.25		3.25
7.92		6.79		6.19		5.99		5.48		5.47
9.65		1.99		6.14		4.12		6.25		4.96
11.11		2.98		5.29		2.57		10.24		3.25
6.22		3.06		2.66		5.21		6.47		4.58
10.68		3.45		3.88		4.35		8.25		4.19
9.93		5.17		4.99		4.15		4.97		1.28
6.43		5.78		3.3		4.67		4.54		1.53
7.08		4.26		5.06		3.46		3.54		2.47
8.36		1.93		3.7		6.06		5.57		3.27
5.81		2.74		3.57		1.3		5.04		1.25
6.56		3.83		3.89		1.05		7.45		3.44
4.79		3.58		1.89		1.32		6.81		4.15
5.68		2.38		4.53		1.14		6.25		3.94
9.03		4.95		4.91		3.02		5.24		4.7
7.63		3.11		2.98		3.62		5.26		3.2
11.99		4.21		3.84		4.14		3.28		2.9
7.19		10.26		10.76		2.47		2.5		1.25
7.19		8.57		8.82		4.58		3.65		2.24
6.17		4.55		6.61		2.74		8.29		2.83
7.68		10.28		9.05		5.47		4.58		3.9
10.42		5.68		7.9		1.28		7.75		1.5
7.31		3.54		6.51		2.08		5.8		4.8
7.5		3.98		3.75		2.39		3.95		4.13
9.57		4.05		9.59		0.96		4.49		3.74
7.04		2.31		7.06		1.91		2.56		4.5
10.25		4.31		9.3		2.47		2.41		0.78
7.32		5.03		2.71		1.76		2.27		1.25
5.93		3.25		6.42		2.18		5.68		2.77
7.36		3.58		5.47		2.86		8.72		2.54
6.48		4.39		8.58		3.28		5.5		3.25
5.82		6.16		6.48		3.14		5.04		2.56
5.89		7.23		5.41		2.18		7.05		3.41
2.87		4.42		5.99		2.73		5.14		4.23
7.28		1.77		6.34		4.13		9.57		4.23
7.57		1.48		5.855		1.28		4.45		5.12
7.43		3.58		5.46		1.94		2.64		4.25
8.2		6.28		2.85		1.725		2.23		5.64
7.86		5.66		4.46		3.34		4.04		3.14
10.98		3.05		9.02		5.36		3.85		1.47
6.17		5.47		10.93		5.585		8.2		3.12
6.87		4.56		3.81		3.14		5.45		1.48
5.44		4.28		5.11		2.115		4.99		2.64
7.58		4.085		3.475		3.12		7.02		2.47
8.8725		4.12		3.455		2.985		3.46		2.47
5.0525		3.21		4.39		3.02		8.84		3.45
9.57		4.02		5.115		2.96		4.23		2.36
9.25		2.68		4.54		2.915		6.83		3.11
4.0125		2.5		5.12		3.07		3.65		1.47
5.53		2.62		6.205		3.875		4.84		2.58
4.16		3.12		6.25		3.04		4.46		1.25
9.56		3.15		5.68		2.14
4.155		3.95
10.25		6.16
4.8375		3.25
5.1475		3.21
8.675		2.29
Mean length		Mean length		Mean length		Mean length		Mean length		Mean length
7.50975		4.36356		5.66641		3.10675		5.57327		3.16235

## Sheet: E84AK577A-WRN+K274A-WRNIP1
IdU length (red)		CldU length (green)		IdU length (red)		CldU length (green)		IdU length (red)		CldU length (green)
4.09		1.79		4.72		1		5.08		5.77
5.16		2.09		4.55		1.66		5.77		2.07
4.22		2.92		3.34		2.65		4.86		3.58
2.08		2.95		4.01		1.06		6.6		6.61
4.39		2.02		2.48		2.61		6.19		6.79
3.61		2.38		4.09		0.91		6.14		1.99
5.9		2.54		4.72		1.16		5.29		4.58
6.31		2.66		3.39		2.4		2.66		3.06
7.87		1.77		2.82		2.43		3.88		3.45
6.08		2.34		4.55		1.63		4.99		5.17
5.17		3.88		4.41		3.48		3.3		3.47
4.77		3.62		5.18		3.31		5.06		4.26
4.75		2.43		5.47		3.23		3.7		1.93
6.85		1.62		3.94		3.32		3.57		2.74
2.75		1.65		4.16		2.79		3.89		3.83
5.47		3.16		4.31		2.49		1.89		1.42
5.67		2.97		2.74		1.08		4.53		2.38
3.22		2.16		3.32		2.37		4.91		4.95
4.03		2.46		3.53		2.64		2.98		3.11
4.15		2.14		2.66		1.7		3.84		4.21
4.27		1.25		4.45		1.04		6.93		2.95
3.57		2.23		4.16		2.64		4.73		1.54
3.86		2.47		4.18		3.44		6.11		3.87
7		1.59		4.29		3.3		5.36		3.44
3.86		3.02		3.95		1.09		2.51		2.47
4.25		3.3		5.17		1.51		4.81		3.58
3.78		3.23		6.44		2.55		6.54		2.64
6		1.54		2.88		3.07		4.51		1.24
3.51		2.99		3.25		2.4		5.05		3.58
5.57		1.46		4.64		2.12		5.94		3.05
4.62		1.79		3.05		1.75		5.63		2.51
5.63		1.39		8.84		2.55		4.43		1.79
5.13		1.76		3.73		2.61		4.04		1.43
3.15		2.99		2.94		1.52		3.75		2.14
5.22		1.06		3.09		1.31		6.06		3.58
5.72		2.38		4.66		2.94		7.49		2.17
7.01		2.71		3.44		2.34		8.25		5.47
6.42		3.39		5.4		4.7		7.21		3.62
4.57		1.43		4.31		1.95		6.25		3.43
4.22		1.18		5.12		0.86		7.25		3.66
4.56		1.83		6.1		2.86		8.14		2.33
4.87		2.44		4.59		3.53		6.24		4.69
				5.92		0.92		5.89		3.58
				4.2		3.23
Mean length		Mean length		Mean length		Mean length		Mean length		Mean length
4.84119		2.30905		4.25432		2.27614		5.1686		3.35186
